# Supplementary material for: Classification of COPD patients and compliance to recommended treatment in Greece according to GOLD 2017 report: the RELICO study
Source: Springer Nature journal article supplement (doi:10.1186/s12890-021-01576-6), 2021-07-09
Supplement: MOESM1 [file 19348574]

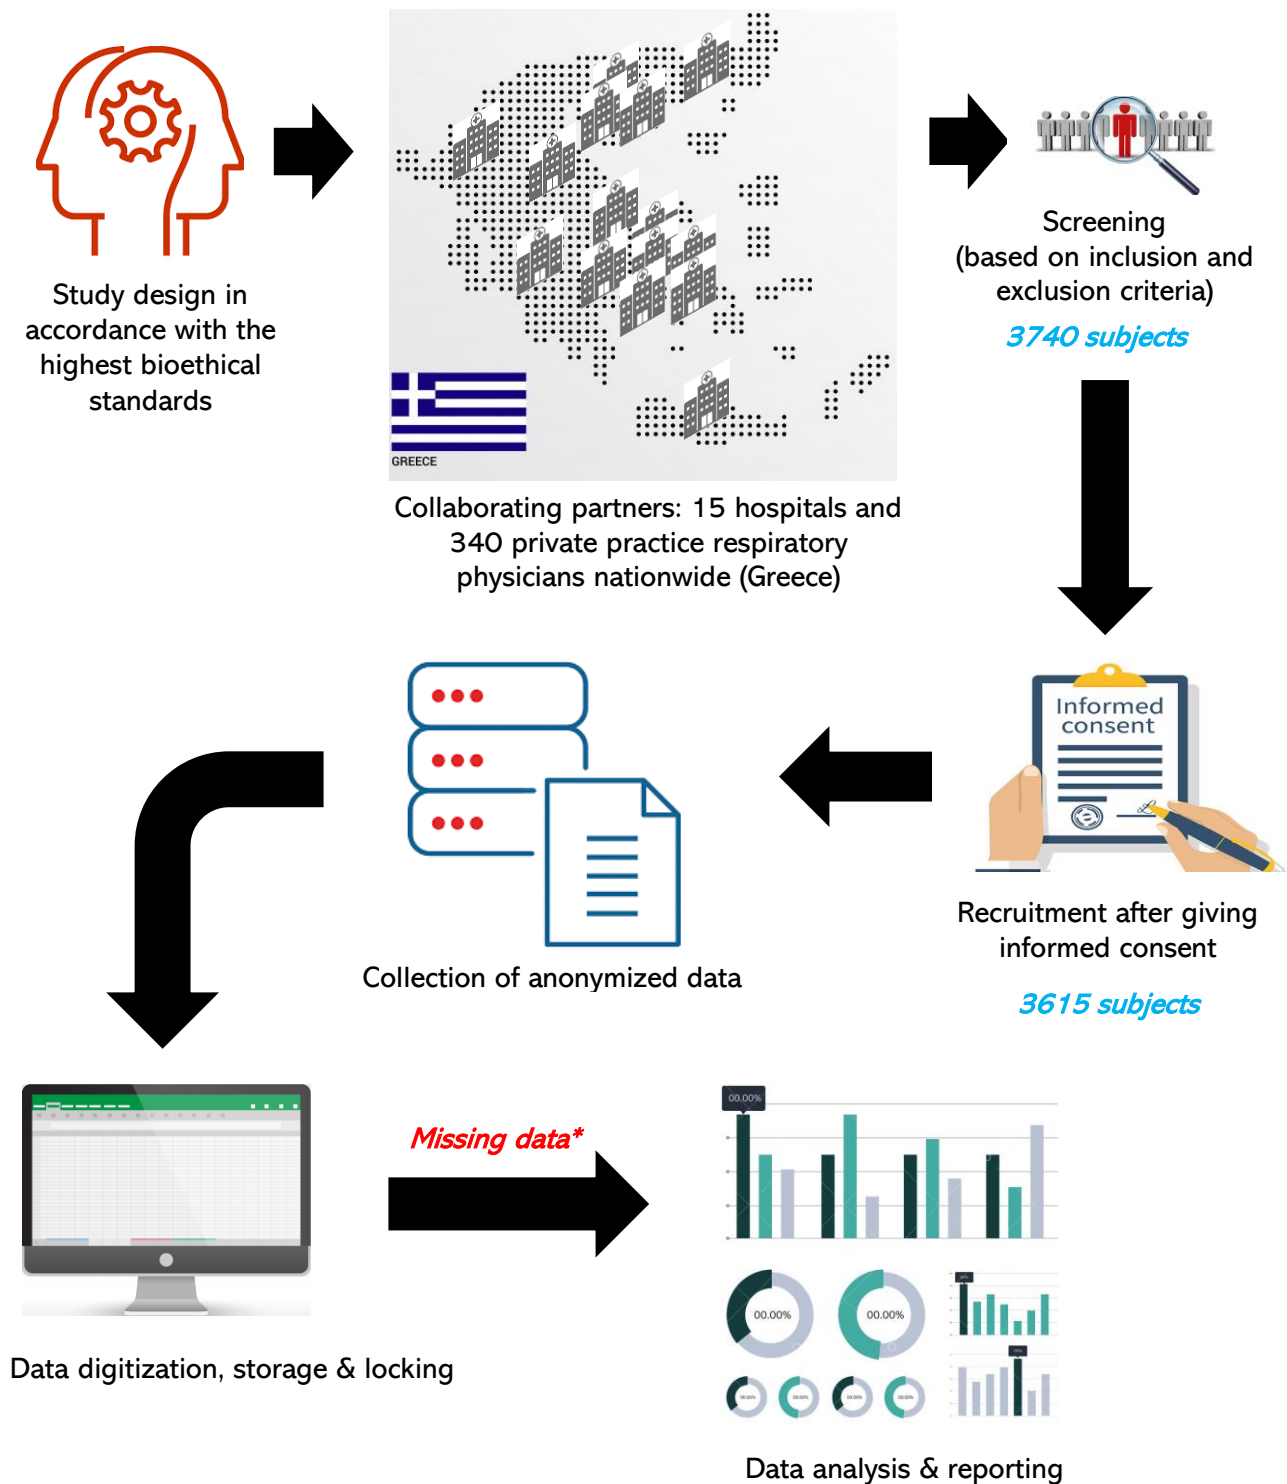

### Supplementary Figure 1

Pipeline of the different stages of this cross-sectional observational study. The finalized database contains data from 3615 subjects. Sixty-five different parameters (variables) were collected per subject. Various isolated missing values have been retrospectively identified in some of the subjects (\*). These relate to either the subjects' or the medical doctors' negligence to complete all domains of the corresponding case report form, which occurred in a random manner i.e., cannot introduce a systematic bias into the study.

CAT: COPD assessment test, COPD: chronic obstructive pulmonary disease

| <b>Gender (N=3604)</b>                 |               |
|----------------------------------------|---------------|
| Male                                   | 2665 (73.9%)  |
| Female                                 | 939 (26.1%)   |
| <b>Age (years) (N=3613)</b>            |               |
| VALUE RANGE                            | 32-95         |
| MEDIAN                                 | 69            |
| MEAN (+/- SD)                          | 68.6 (10)     |
| <b>Age group (N=3613)</b>              |               |
| < 40 YoA                               | 2 (0.05%)     |
| 40-59 YoA                              | 668 (18.5%)   |
| 60-79 YoA                              | 2444 (67.65%) |
| 80-99 YoA                              | 499 (13.8%)   |
| <b>Height (cm) (N=3615)</b>            |               |
| VALUE RANGE                            | 138-205       |
| MEDIAN                                 | 170           |
| MEAN (+/- SD)                          | 169.2 (8.5)   |
| <b>Weight (kg) (N=3614)</b>            |               |
| VALUE RANGE                            | 40-197        |
| MEDIAN                                 | 79            |
| MEAN (+/- SD)                          | 80 (16.6)     |
| <b>BMI (kg/m<sup>2</sup>) (N=3614)</b> |               |
| VALUE RANGE                            | 14.7-72.4     |
| MEDIAN                                 | 27.4          |
| MEAN (+/- SD)                          | 27.9 (5.1)    |
| <b>BMI group (N=3614)</b>              |               |
| < 18.5 kg/m <sup>2</sup>               | 48 (1.3%)     |
| 18.5 – 24.9 kg/m <sup>2</sup>          | 957 (26.5%)   |
| 25 – 29.9 kg/m <sup>2</sup>            | 1554 (43%)    |
| > 30 kg/m <sup>2</sup>                 | 1055 (29.2%)  |

|        |                    | MEAN (+/- SD) |                           |             |             |
|--------|--------------------|---------------|---------------------------|-------------|-------------|
|        |                    | BMI           | SBP / DBP                 | HR          | RR          |
| MALE   | 40-59 YoA [N=450]  | 28.8 (5.2)    | 130 (11.7) / 80 (9)       | 78.6 (9)    | 18.6 (11.3) |
|        | 60-79 YoA [N=1811] | 27.9 (4.7)    | 130.7 (12.2) / 79.4 (9.3) | 76.8 (9.5)  | 18 (9)      |
|        | 80-99 YoA [N=401]  | 27.7 (4.3)    | 132.5 (13.5) / 79.8 (9.2) | 75.9 (10.2) | 17.9 (7.7)  |
| FEMALE | 40-59 YoA [N=217]  | 26.9 (6.5)    | 126.2 (12.1) / 78 (8.4)   | 77.1 (9.1)  | 19.3 (11)   |
|        | 60-79 YoA [N=626]  | 27.7 (5.7)    | 128.5 (13) / 78.2 (9.6)   | 77.4 (8.8)  | 18.1 (9.2)  |
|        | 80-99 YoA [N=95]   | 26.9 (4.2)    | 130.7 (14.6) / 79.8 (9.1) | 76.4 (11.8) | 19 (9.1)    |

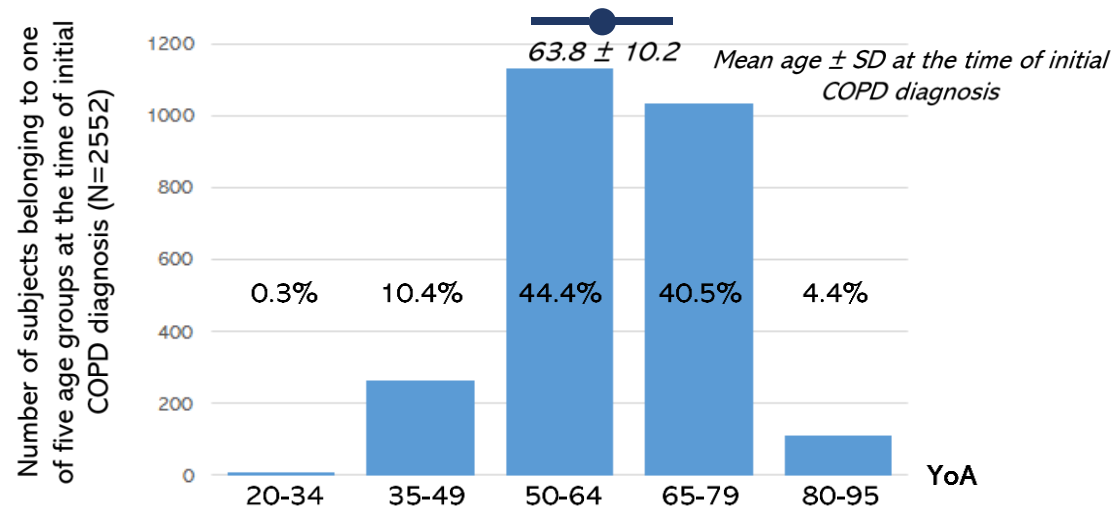

## Supplementary Figure 2

(Left panel) Demographic characterization of the study sample. (Upper right panel) Summary statistics on the vital signs of the study sample divided by gender and age group. (Lower right panel) Distribution of age for the study sample at the time of initial COPD diagnosis. The great majority of individuals belonged to either the 50-64 YoA or the 65-79 YoA groups at the time of their initial COPD diagnosis. It should be noted that two subjects < 40 years of age were mistakenly classified as eligible study participants and were retained in data analysis, without thought affecting the study results or inferences.

BMI: body mass index (kg/m<sup>2</sup>), (S/D)BP: (systolic/diastolic) blood pressure (systolic/diastolic, in mmHg), HP: heart rate (min<sup>-1</sup>), RR: respiratory rate (min<sup>-1</sup>), SD: standard deviation, YoA: years of age

## Supplementary Table 1

Summary statistics on CAT questionnaire

|                                                               | N           | MEAN        | SD         |
|---------------------------------------------------------------|-------------|-------------|------------|
| <b>TOTAL SCORE (sum of partial domains)</b>                   | <b>3522</b> | <b>16.5</b> | <b>7.7</b> |
| Coughing                                                      | 3610        | 2.2         | 1.1        |
| Phlegm in the chest                                           | 3605        | 2.1         | 1.1        |
| Feeling of tightness in the chest                             | 3604        | 1.8         | 1.2        |
| Breathlessness when walking up a hill or one flight of stairs | 3612        | 2.9         | 1.3        |
| Limitation in doing activities at home                        | 3594        | 2.0         | 1.3        |
| Confidence on leaving home despite the lung condition         | 3600        | 1.9         | 1.4        |
| Sleeping soundly                                              | 3607        | 1.6         | 1.2        |
| Having lots of energy                                         | 3592        | 2.2         | 1.2        |

CAT consists of 8 items, each of which describes the best to worst case of a state on a 0-5 scale.

N: number of values, SD: standard deviation

## Supplementary Table 2

Summary of COPD exacerbations within the last 12 months

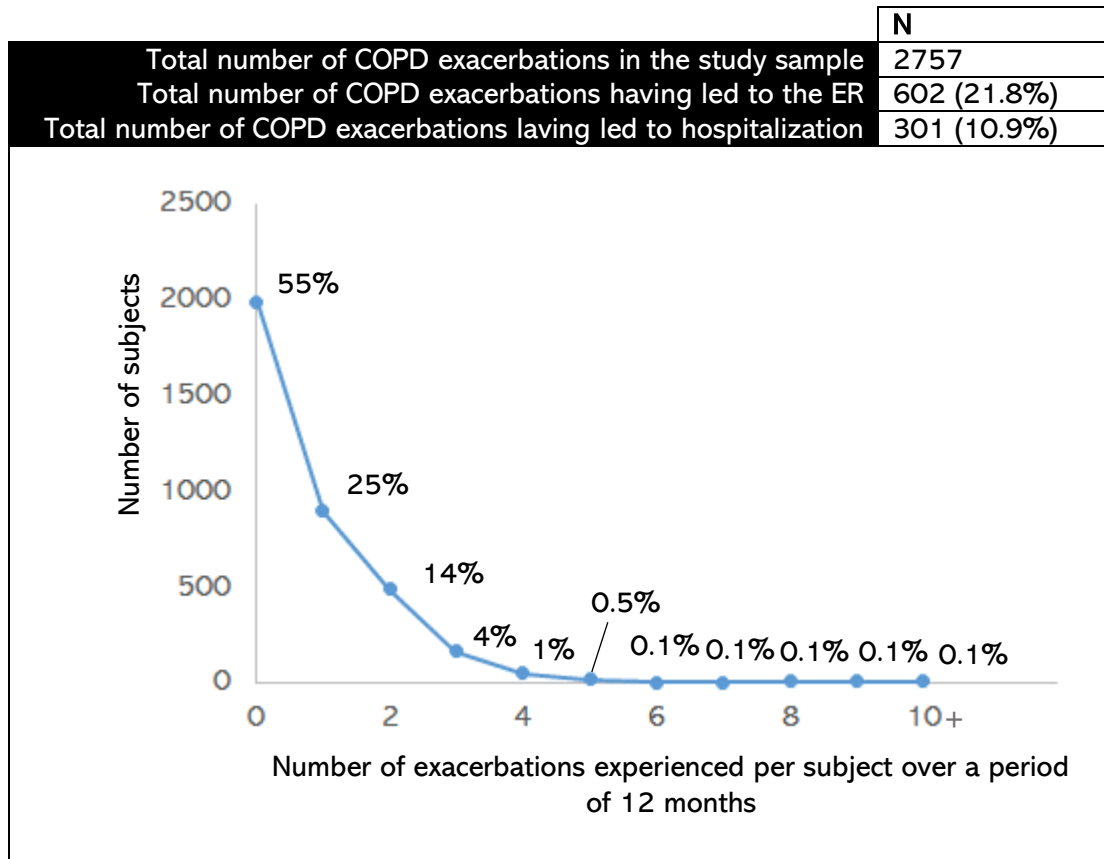

The great majority (94%) of the subjects who participated in this observational study had experienced maximum 2 exacerbations of COPD over the period of the last 12 months, usually no exacerbation (55%) or just one exacerbation (25%).

COPD: chronic obstructive pulmonary disease, ER: emergency room, N: number of cases

Supplementary Figure 3

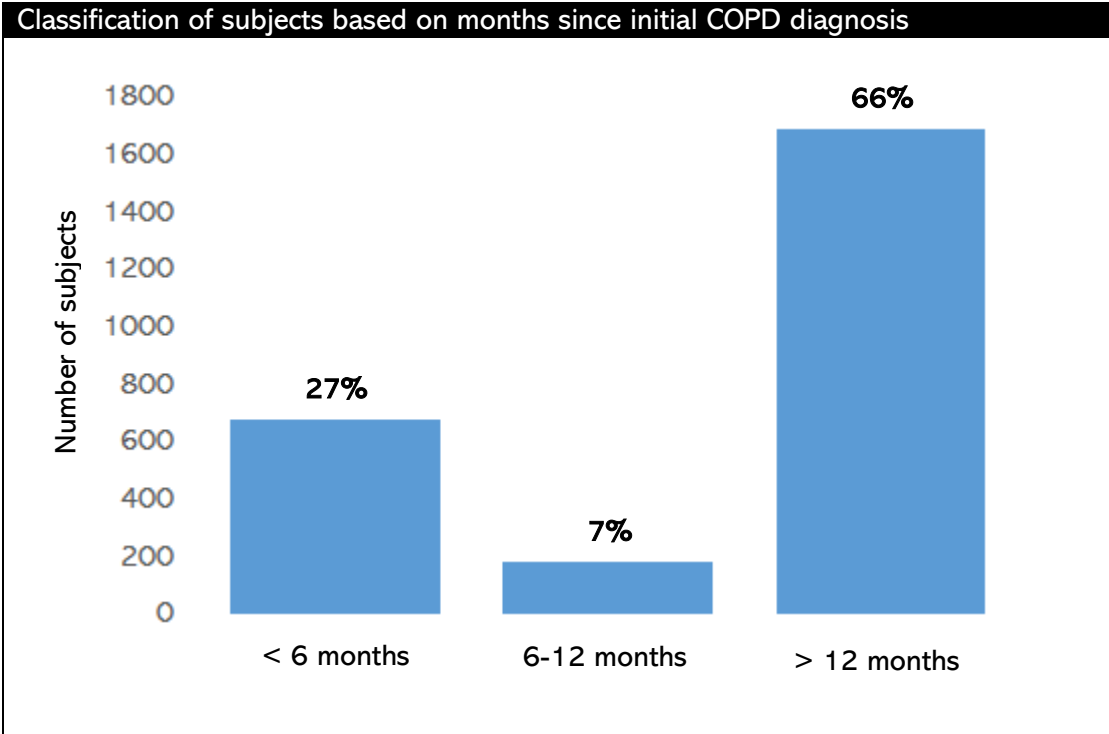

COPD: chronic obstructive pulmonary disease, N: number of subjects, SD: standard deviation

### Supplementary Table 3

(a) Subject allocation based on gender and ABCD assessment

|                        |       | MALE       | FEMALE    |
|------------------------|-------|------------|-----------|
| ABCD<br>classification | A     | 483 (19%)  | 151 (16%) |
|                        | B     | 1525 (59%) | 539 (59%) |
|                        | C     | 59 (2%)    | 20 (2%)   |
|                        | D     | 523 (20%)  | 209 (23%) |
|                        | TOTAL | 2590       | 919       |

(b) Subject allocation based on body mass index and ABCD assessment

|                        |       | < 25      | 25 – 29.9 | > 30      |
|------------------------|-------|-----------|-----------|-----------|
| ABCD<br>classification | A     | 169 (17%) | 281 (19%) | 185 (18%) |
|                        | B     | 556 (57%) | 895 (59%) | 620 (60%) |
|                        | C     | 21 (2%)   | 33 (2%)   | 25 (2%)   |
|                        | D     | 229 (24%) | 299 (20%) | 206 (20%) |
|                        | TOTAL | 975       | 1508      | 1036      |

### Supplementary Table 4

List of the comorbid conditions present in COPD patients

| COMORBID CONDITIONS                                     |                                                                                                                                                                                                                              | CASES        |
|---------------------------------------------------------|------------------------------------------------------------------------------------------------------------------------------------------------------------------------------------------------------------------------------|--------------|
| Cardiovascular disorders                                | Heart failure, ischemic heart disease, arrhythmias, peripheral vascular disease, hypertension, stroke, carotid artery atheromatosis, valve dysfunction, ocular artery thrombosis, pulmonary embolism, pulmonary hypertension | 2707 (59.6%) |
| Endocrine and metabolic disorders                       | Diabetes mellitus & metabolic syndrome, dyslipidemia, obesity, thyroid disease, thyroidectomy, hyperuricemia                                                                                                                 | 684 (15.1%)  |
| Neuropsychiatric problems                               | Anxiety, depression, bipolar disease, epilepsy, multiple sclerosis, Parkinson's disease, vertigo, dementia, trigeminal neuralgia, schizophrenia                                                                              | 478 (10.5%)  |
| Gastroenterological problems                            | Gastroesophageal reflux, alcoholic hepatitis/steatohepatitis, gastrectomy, bowel obstruction, colon diverticulum, ulcers, umbilical hernia, irritable bowel syndrome, choledocholithiasis, chronic constipation              | 259 (5.7%)   |
| Oncological cases                                       | Solid or hematological, benign or malignant                                                                                                                                                                                  | 173 (3.8%)   |
| Myoskeletal problems                                    | Osteoporosis, osteoarthritis, bone fractures, spine stenosis                                                                                                                                                                 | 163 (3.6%)   |
| Autoimmune disorders, chronic infections, and allergies | Allergy, hashimoto disease, hepatitis, tuberculosis, psoriasis, vasculitis, ankylosing spondylitis, colitis, rheumatoid arthritis, rheumatoid polymyalgia, lupus erythematosus, other                                        | 44 (0.9%)    |
| Other problems                                          | Other respiratory disorders, renal disorders, hematological disorders, or ophthalmological problems                                                                                                                          | 36 (0.8%)    |
| TOTAL                                                   |                                                                                                                                                                                                                              | 4544 (100%)  |

COPD: chronic obstructive pulmonary disease

Supplementary Figure 4

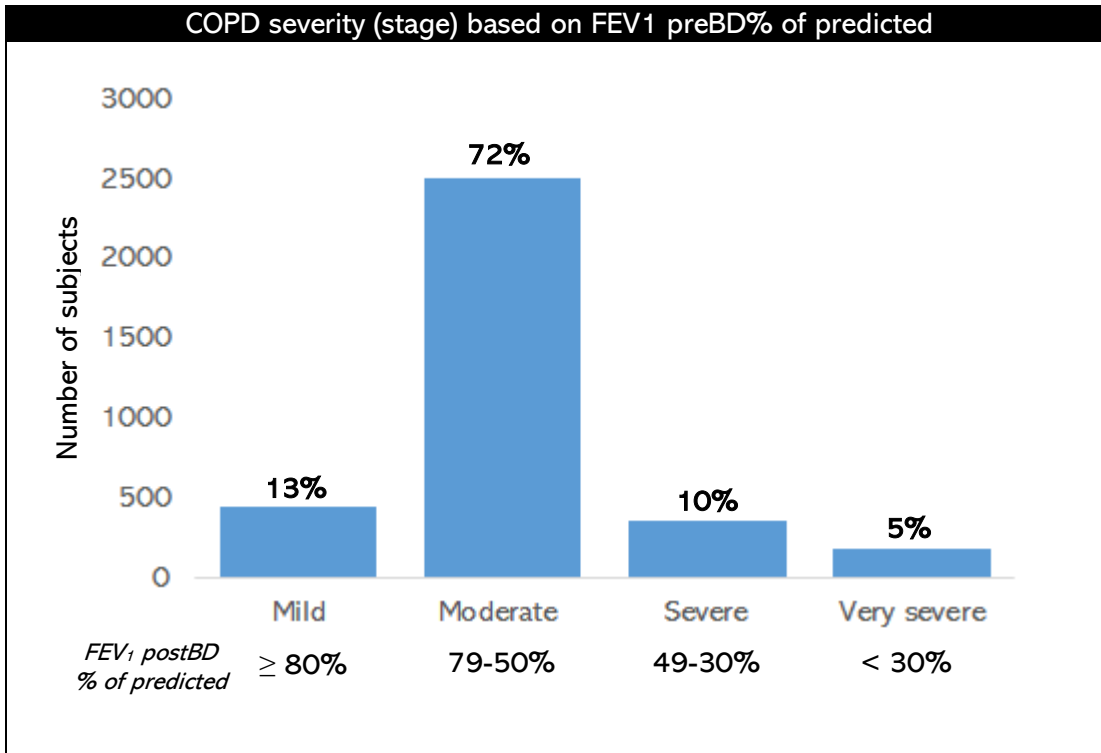

FEV<sub>1</sub>: forced expiratory volume of the first second, FVC: forced vital capacity, postBD: post bronchodilation, postPD: post bronchodilation, SD: standard deviation



LABA  
LAMA  
ICS  
LABA+LAMA  
LABA+ICS

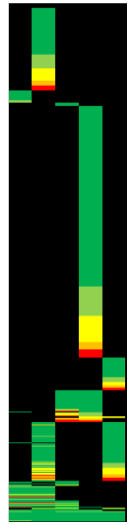

**A**

LABA  
LAMA  
ICS  
LABA+LAMA  
LABA+ICS

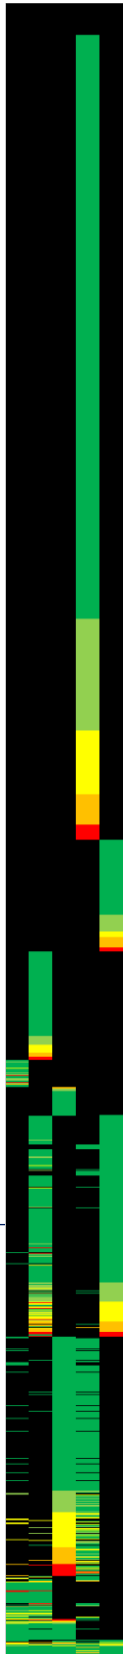

**B**

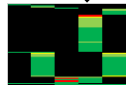

**C**

}

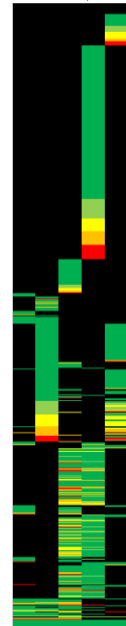

**D**

|                                   |     |
|-----------------------------------|-----|
| No treatment                      | 13  |
| LAMA                              | 18  |
| LABA                              | 10  |
| ICS                               | 40  |
| LAMA+LABA                         | 261 |
| ICS+LABA                          | 53  |
| LABA+LAMA+ICS                     | 314 |
| LAMA+ICS                          | 7   |
| 2 x LAMA or LABA+ICS              | 2   |
| 3+ x bronchodilators ( $\pm$ ICS) | 16  |

|                                   |    |
|-----------------------------------|----|
| No treatment                      | 0  |
| LAMA                              | 3  |
| LABA                              | 1  |
| ICS                               | 1  |
| LAMA+LABA                         | 37 |
| ICS+LABA                          | 6  |
| LABA+LAMA+ICS                     | 30 |
| LAMA+ICS                          | 0  |
| 2 x LAMA or LABA+ICS              | 0  |
| 3+ x bronchodilators ( $\pm$ ICS) | 1  |

|                                   |     |
|-----------------------------------|-----|
| No treatment                      | 6   |
| LAMA                              | 101 |
| LABA                              | 15  |
| ICS                               | 4   |
| LAMA+LABA                         | 326 |
| ICS+LABA                          | 44  |
| LABA+LAMA+ICS                     | 115 |
| LAMA+ICS                          | 2   |
| 2 x LAMA or LABA+ICS              | 1   |
| 3+ x bronchodilators ( $\pm$ ICS) | 21  |

|                                   |      |
|-----------------------------------|------|
| No treatment                      | 40   |
| LAMA                              | 136  |
| LABA                              | 34   |
| ICS                               | 35   |
| LAMA+LABA                         | 1049 |
| ICS+LABA                          | 165  |
| LABA+LAMA+ICS                     | 521  |
| LAMA+ICS                          | 11   |
| 2 x LAMA/LABA+ICS                 | 2    |
| 3+ x bronchodilators ( $\pm$ ICS) | 79   |

- No missing doses
- Frequency of missing doses: 1/month
- Frequency of missing doses: 2/month
- Frequency of missing doses: 1/week
- Frequency of missing doses: 2/week
- No use of that drug

## Supplementary Figure 5

Colourmaps depicting the combination of principal treatments (LAMA, LABA, ICS and their combination) used by the study participants per group of the ABCD assessment tool, and their compliance to each of them. Each colourmap consists of 5 columns, one per treatment type, and multiple compressed rows, one per subject (635 for group A, 2072 for group B, 79 for group C and 734 for group D). Black cells indicate that the corresponding treatment type is not used by the corresponding subject. Non-black cells indicate that the corresponding treatment type is used by the corresponding subject; colour differences (dark green, light green, yellow, orange and red) indicate differences in the consistency by which subjects receive the doses of the corresponding treatment types on a weekly or monthly basis. The accompanying small tables show the number of the different treatment strategies prescribed to the subjects per ABCD group.

ICS: inhaled corticosteroids, LABA: long-acting  $\beta$  adrenoreceptor agonists, LAMA: long-acting muscarinic receptor antagonists

### Supplementary Table 5

Use of other pharmacological agents, for symptomatic treatment, besides the main treatment options for the chronic management of COPD (LAMA, LABA, ICS)

| PHARMACOLOGICAL AGENT CATEGORY | USED        | NOT USED     |
|--------------------------------|-------------|--------------|
| SABA                           | 553 (15.5%) | 3009 (84.5%) |
| SAMA                           | 169 (4.7%)  | 3389 (95.3%) |
| Methylxanthines                | 118 (3.3%)  | 3434 (96.7%) |
| Oral glucocorticoids           | 58 (1.6%)   | 3495 (98.4%) |
| PDE4 inhibitors                | 169 (4.8%)  | 3388 (95.2%) |
| Antibiotics                    | 110 (3.1%)  | 3442 (96.9%) |
| Antioxidants                   | 50 (1.4%)   | 3501 (98.6%) |
| Mucolytic agents               | 272 (7.7%)  | 3282 (92.3%) |

ICS: inhaled corticosteroids, LABA: long-acting  $\beta$  adrenoreceptor agonists, LAMA: long-acting muscarinic receptor antagonists, SABA: short-acting  $\beta$  adrenoreceptor agonists, SAMA: short-acting muscarinic receptor antagonists

### Supplementary Table 6

Distribution of vaccinated patients among ABCD groups

|   | No vaccination | Influenza  | S. pneumoniae | Both         | TOTAL |
|---|----------------|------------|---------------|--------------|-------|
| A | 137 (21.9%)    | 57 (9.1%)  | 83 (13.2%)    | 350 (55.8%)  | 627   |
| B | 392 (19.1%)    | 182 (8.9%) | 242 (11.8%)   | 1232 (60.2%) | 2048  |
| C | 22 (28.2%)     | 4 (5.15)   | 12 (15.4%)    | 40 (51.3%)   | 78    |
| D | 109 (15%)      | 59 (8.1%)  | 89 (12.2%)    | 471 (64.7)   | 728   |

## Supplementary Table 7

Compliance of the study sample to the different COPD-related treatment categories

| Chronic COPD treatment (main treatment options)   | %COMPLIANCE |       |       |
|---------------------------------------------------|-------------|-------|-------|
|                                                   | Perfect     | Good  | Poor  |
| LAMA                                              | 71.5%       | 24.5% | 4%    |
| LABA                                              | 74.6%       | 21.7% | 3.7%  |
| ICS                                               | 66.7%       | 27.7% | 5.6%  |
| LAMA+LABA                                         | 74.6%       | 22.8% | 2.6%  |
| ICS+LABA                                          | 69.9%       | 26.1% | 4%    |
| Symptomatic relief (supporting treatment options) | Perfect     | Good  | Poor  |
| SABA                                              | 64.6%       | 22.8% | 12.6% |
| SAMA                                              | 67.9%       | 22%   | 10.1% |
| Methylxanthines                                   | 68.6%       | 23.6% | 7.8%  |
| Oral glucocorticoids                              | 76.4%       | 21.8% | 1.8%  |
| PDE4 inhibitors                                   | 70.4%       | 27.1% | 2.5%  |
| Antibiotics                                       | 84.5%       | 13.7% | 1.8%  |
| Antioxidants                                      | 51.1%       | 37.8% | 11.1% |
| Mucolytic agents                                  | 51.5%       | 34.3% | 14.2% |

%Compliance: the percentage of patients using each treatment category, who show either a perfect or a good or a poor compliance to taking the corresponding drug

Perfect compliance: the patient misses no doses monthly, Good compliance: patient misses one dose weekly at the worst case scenario, Poor compliance: patient misses two or more doses weekly

ICS: inhaled corticosteroids, LABA: long-acting  $\beta$  adrenoreceptor agonists, LAMA: long-acting muscarinic receptor antagonists, SABA: short-acting  $\beta$  adrenoreceptor agonists, SAMA: short-acting muscarinic receptor antagonists
